# Supplementary material
Source: publisher figshare collection journal article supplement (https://sage.figshare.com/ndownloader/files/13569158)
Supplement: Supplementary file 1 [file 13569158]

**Supplementary table A: *Phases of Thematic Analysis (Braun and Clarke, 2006)***

| Phases of Thematic Analysis |                                                                    |
|-----------------------------|--------------------------------------------------------------------|
| 1.                          | Familiarising yourself with your data and note down initial ideas  |
| 2.                          | Generating initial codes from interesting features                 |
| 3.                          | Searching for themes by collating the codes into potential themes  |
| 4.                          | Reviewing the themes and generate a thematic “map” of the analysis |
| 5.                          | Defining and naming themes                                         |
| 6.                          | Producing the report                                               |

Braun, V. and Clarke, V. (2006) 'Using thematic analysis in psychology', *Qualitative Research in Psychology*, 3(2), pp. 77-101. doi: 10.1191/1478088706qp063oa.
